# Supplementary material for: Trans-Pacific transport and evolution of aerosols: Spatiotemporal characteristics and source contributions
Source: Copernicus journal article supplement (doi:10.5194/acp-2019-212), 2019-05-20
Supplement: Supplementary file [file acp-2019-212-RC1-supplement.pdf]

Review on the “Trans-Pacific transport and evolution of aerosols: Spatiotemporal characteristics and source contributions” by Hu et al.

I went through my previous comments and I would say the authors addressed well for the majority of my previous comments. Again, I recommend this paper for the publication with minor revision. There are a few minor comments for further improvement.

Comments:

P4L21-P5L2: The current simulation was made in 1 degree resolution which is quite common in global models, for example several models participating AeroCom experiments. The WRF model can run with even higher resolution. What are the sensitivity to the different horizontal resolution? And please comment what are the advantage of your WRF model compared to global models.

P5L18-21: It needs to be more quantitative. Please add some statistics. What are bias, rmse, correlation, and/or std between model and obs?

P7L10-12: This sentence does not read well. Please restate this sentence.

P8L26-27: The sentence about dust is too brief. What region is considered here? Please add dust contribution below 4 km.

P9L15-16: Please provide more detailed explanation how the mass flux is calculated. Which level of wind is used? And how wind information is combined with mass? Which direction is considered in the calculation and why? Is the flux calculation conducted every time step or monthly or annually? Adding these additions should not be difficult.

P11L25-30: DRF ATM especially for warming by BC and dust needs comparison with other estimates. Please add citations and range.

Figure 11 and text: Again, BC contribution in Figure 11 is so dominant. Please compare with other estimates.
